# Supplementary material for: Microvesicles derived from human Wharton’s Jelly mesenchymal stromal cells ameliorate renal ischemia-reperfusion injury in rats by suppressing CX3CL1
Source: PubMed Central journal article supplement (PMC4055103; doi:10.1186/scrt428), 2014-03-19
Supplement: scrt428-S1.pdf [file scrt428-S1.pdf]

Additional file 1: Figure S1

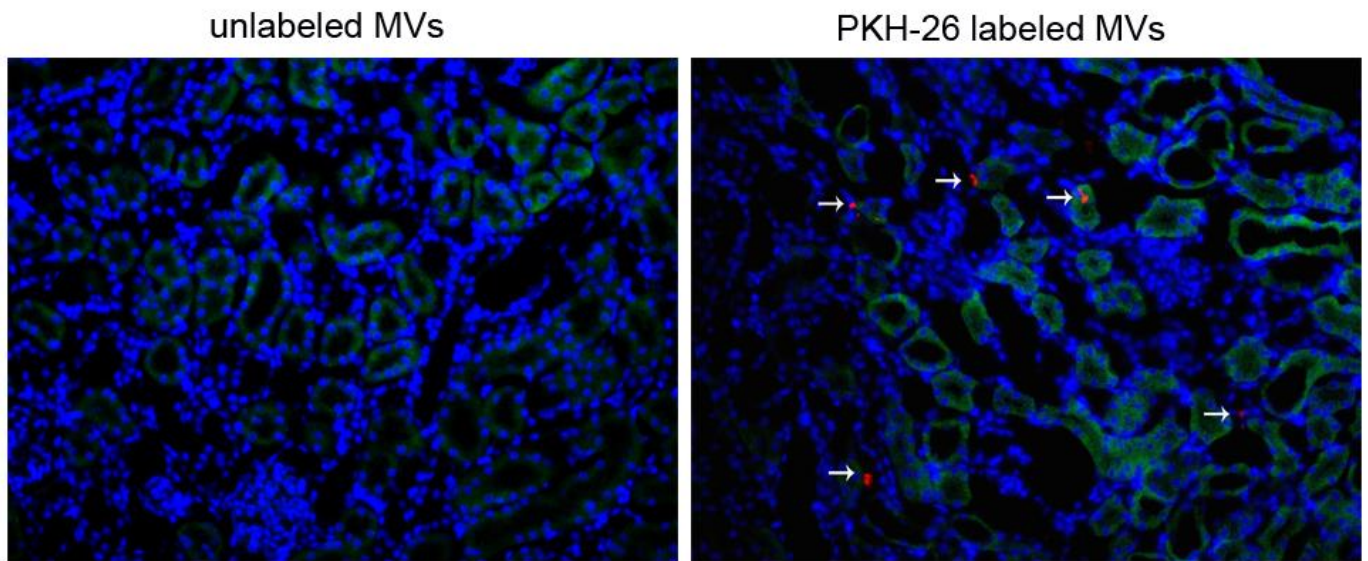

**Figure.S1 Distribution of hWJMSC-MVs after injection.**

Representative confocal micrographs of frozen tissue sections of rats injected with PKH26-labeled MVs (red) kidneys. Red fluorescence (white arrows) was observed in the kidneys after injection of PKH26-labeled MVs at 3 h. Tubular epithelial cell cytoplasm and nuclei were stained green and blue respectively. Original magnification  $\times 200$ .
